# Supplementary material
Source: PubMed Central journal article supplement (PMC3548032)
Supplement: NIHMS413378-supplement-1_si_001.pdf [file NIHMS413378-supplement-1_si_001.pdf]

Supplementary Material for:

**Docking Interactions of Hematopoietic Tyrosine Phosphatase (HePTP) with the  
MAP Kinases ERK2 and p38 $\alpha$**

Andrea Piserchio, Dana M Francis, Dorothy Koveal, Kevin N. Dalby, Rebecca Page,  
Wolfgang Peti, and Ranajeet Ghose.

## Materials and Methods

Uniformly  $^2\text{H}$ ,  $^{13}\text{C}$ ,  $^{15}\text{N}$ -labeled resting ERK2<sup>1</sup> (called ERK2 from hereon forward), unlabeled full-length HePTP<sup>2</sup> and the KIMKIS peptide (encoding HePTP residues 15-56 and containing a C42S mutation)<sup>3</sup> were expressed and purified as described before. Unlabeled KIM<sub>15-31</sub> peptide ( $^{15}\text{VRLQERRGSNVALMLDV}^{31}$ ) was purchased from BioSynthesis and used following published protocols<sup>3</sup>. All NMR samples were prepared in NMR buffer (50 mM HEPES, 150 mM NaCl, 5 mM DTT, at pH 6.8 containing 10% D<sub>2</sub>O). For the NMR-based titration experiments, the KIM<sub>15-31</sub> peptide was dissolved from a concentrated stock into the NMR buffer and added incrementally to an NMR sample containing 130  $\mu\text{M}$  ERK2 (final peptide concentrations: 0, 50, 100, 150, 200, 250, 350, 1000  $\mu\text{M}$ ). A 2D  $^1\text{H}$ ,  $^{15}\text{N}$ -TROSY was collected for each titration point, and 3D TROSY-based HNC $\text{O}^4$  experiments were collected for the first and the last two titration points. All experiments were acquired at 25 °C on a Varian Inova 600 MHz spectrometer equipped with a triple resonance cryogenic probe capable of apply pulsed field gradients on the z-axis.

The complex between ERK2 and full-length HePTP was prepared by mixing equimolar amounts of the two purified proteins and additional purification of their 1:1 complex was carried out using size exclusion chromatography (Superdex 75 16/60, GE HealthCare Biosciences; pre-equilibrated in NMR buffer). The elution peak corresponding to the 1:1 complex was concentrated to a final protein concentration of  $\sim 250 \mu\text{M}$ . 2D  $^1\text{H}$ ,  $^{15}\text{N}$ -TROSY and 3D TROSY-based HNC $\text{O}$  experiments were collected at 25 °C on a Bruker Avance 800 MHz spectrometer equipped with a triple resonance



cryogenic probe capable of applying pulsed field gradients on the z-axis. All data were processed using NMRpipe<sup>5</sup> and analyzed using Sparky.

Chemical shifts perturbations were calculated using the formula:

$$\Delta\delta = \sqrt{(\Delta\delta_{\text{H}})^2 + (0.1\Delta\delta_{\text{C}})^2} \quad (1)$$

Thresholds to identify statistically relevant chemical shift perturbations in ERK2 were determined as described by Schumann *et. al.*<sup>6</sup> and were found to be 0.041 ppm for KIM<sub>15-31</sub> and 0.052 ppm for full-length HePTP. Perturbations for p38 $\alpha$  have been published previously<sup>3</sup>. The amino-acid sequences of the two kinases were aligned using ClustalW2<sup>7</sup> and the results were used for comparison of the spectral perturbations for corresponding residues in ERK2 and p38 $\alpha$ .

For the Isothermal Titration Calorimetry (ITC) measurements, HePTP and ERK2 were equilibrated in the identical buffer (10 mM HEPES, 150 mM NaCl, 0.1 mM EDTA, 0.5 mM TCEP at pH 7.5) and each protein was purified using size exclusion chromatography (Superdex 75 26/60; GE HealthCare Biosciences) immediately prior to the experiment. The KIM<sub>15-31</sub> peptide was solubilized in the identical buffer and the KIMKIS peptide was dialyzed into the identical buffer at 4 °C for 18 hours before the experiment. ITC experiments were performed at 25 °C using a VP-ITC microcalorimeter (Microcal Inc.). Titrant (10  $\mu$ L per injection) was injected into the sample cell over a period of 20 seconds with a 250 second interval between injections to allow for complete equilibration and baseline recovery. 28 injections (28 titration points) were delivered during each experiment, and the solution in the sample cell was stirred at 307 rpm to ensure rapid mixing. To determine the thermodynamic parameters ( $\Delta H$ ,  $\Delta S$ ,  $\Delta G$ ) and the binding constant ( $K_d$ ) for the ERK2:HePTP interaction, HePTP was titrated into ERK2.

To determine the corresponding parameters for the ERK2:KIMKIS and the ERK2:KIM<sub>15-31</sub> interactions, ERK2 was titrated into the KIMKIS and KIM<sub>15-31</sub> peptides, respectively. For all titrations the concentrations were varied slightly to ensure independence of the calculated  $K_d$  from the protein/peptide concentrations. Data were analyzed using a one-site binding model assuming a 1:1 binding stoichiometry using the Origin 7.0 (OriginLab) software. A nonlinear least-squares algorithm and the titrant and sample cell concentrations were used to fit the heat flow per injection to an equilibrium binding equation, providing values of the stoichiometry (n), change in enthalpy ( $\Delta H$ ), and binding constant ( $K_d$ ). All data were collected in triplicate to confirm reproducibility.

p38 $\alpha$ /1-357 1 - MSQERPTFYRQELNK- TIWEVPERYQNLSPVGS GAYGSVCAAFDTKT GHRVAVKKL 55  
 ERK2/1-358 1 MAAAAAAGPFMVRRGOVFDVGRYTNLSYLGEGAYGMVCSAYDNLNKVRVAIKKIS- P 56

p38 $\alpha$ /1-357 56 SRPFQSLIHAKRTRYRELRLLKHKHEENVIGLLDVFTPARSLEEFNDVYLVTHTLMGAD 112  
 ERK2/1-358 57 FEHQTYCORTLRREIKILLRFRHENIIGINDIIR- APTIEOMKDVYLVQDLMETDLYK 112

p38 $\alpha$ /1-357 113 LNNIVKCKOKLTDDHVQFLIYQILRGLKYIHSADIHRDLKPSNLAVNEDCELKILDF 169  
 ERK2/1-358 113 LLKKTQHLSDNHLCYELYQILRGLKYIHSANVLRDLKPSNLLNLTTCDLKICDEFLA 169

p38 $\alpha$ /1-357 170 GLARHTDDE- - - - - MTGYVATRWYRAP EIMLNWMHYNQTVDIWSVGCIMAE LLTGR 220  
 ERK2/1-358 170 RVADPDHDHTGFLTEYVATRWRAP EIMLNSKGYTKSLDIWSVGCILAEMLSNRP I F 226

p38 $\alpha$ /1-357 221 TLFPGTDHIDQLKLI LR LVGTPGAELLKKISS ESARNYIQSLAQMPKMN FANVFI GA 277  
 ERK2/1-358 227 PGKHYLDQLNHILGLGSPSQEDLNCI INLKARNYLLSLPHKNKVPWNR LFPNADSK 283

p38 $\alpha$ /1-357 278 NPLAVDLEKMLVLDSDKRITAAQALAHAYFAOYHDPDDEPVAD- PYDGSFESRDLL 333  
 ERK2/1-358 284 ALDLLDKMLTFNPHKRIEVEQALAHPLYLEQYYDPSDEPIAEAPFKFDMELDDLPK EK 340

p38 $\alpha$ /1-357 334 IDEWKS LTYDEVISFVPPP LLDQEE 357  
 ERK2/1-358 341 LKELLFEETARFQPGYRS- - - - - 358

**Figure S1.** Alignment of the sequences of p38 $\alpha$  (*Mus musculus*, NCBI: NP\_036081.1) and ERK2 (*Rattus norvegicus*, NCBI: NP\_446294.1). The two sequences are 42% identical. The alignment was used for the pairwise comparison of spectral perturbations induced by KIM<sub>15-31</sub> and full-length HePTP on ERK2 and p38 $\alpha$ . A ClustalX coloring scheme is used - red: R, K; magenta: D, E; blue: W, M, I, L, V, A, F, C; Green: Y, H, N, Q, S, T; orange: G; yellow: P. P and G are colored whether conserved or not.

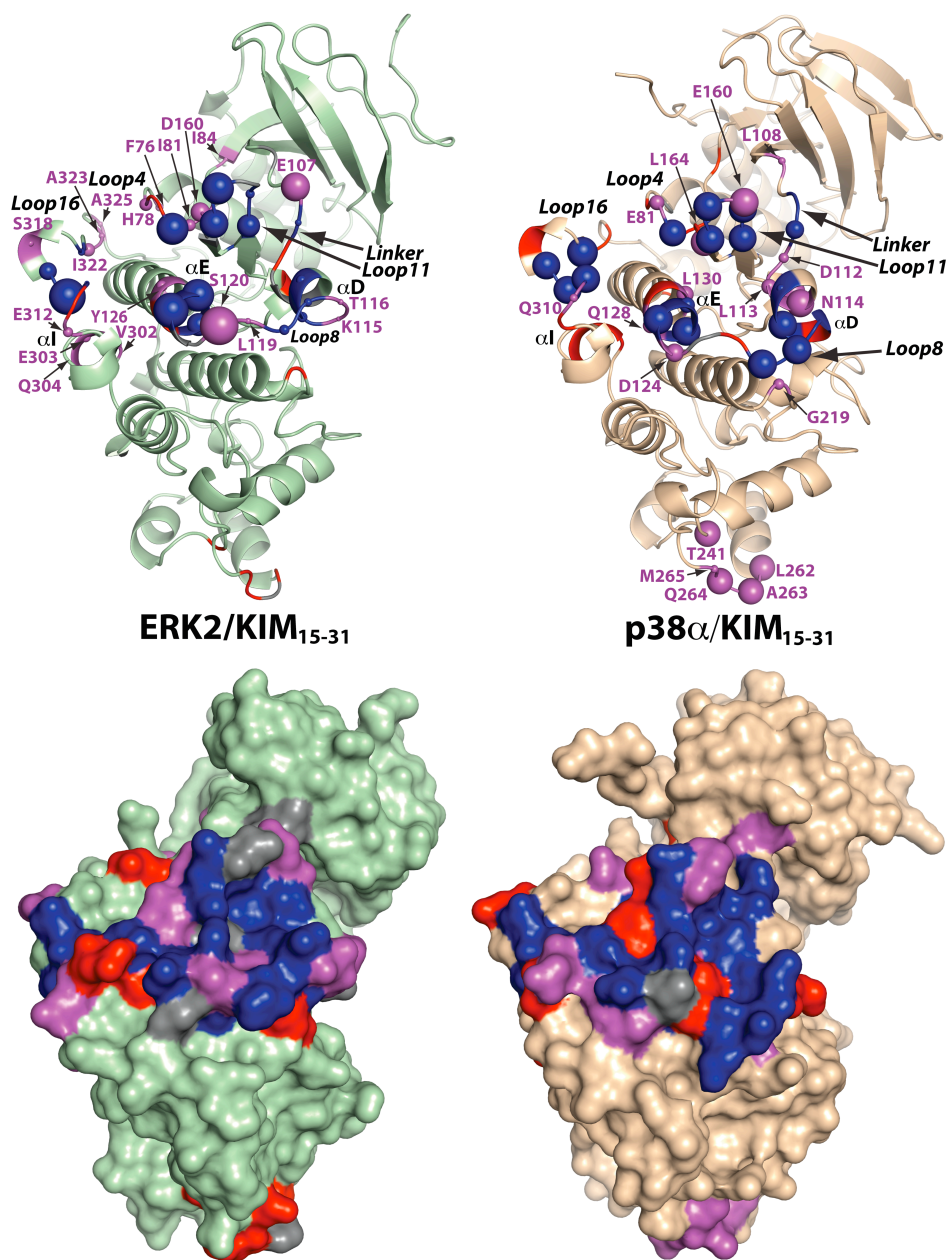

**Figure S2.** Comparison of the perturbations induced by KIM<sub>15-31</sub> on ERK2 (left) and p38α (right) using ribbon (top) and surface (bottom) representations. The radii of the spheres on the top panel are proportional to the relative magnitude of the chemical shift perturbations. For visualization purposes an arbitrary value of 0.32 ppm was assigned to disappearing resonances, and the magnitude of the perturbation of the ERK2 residue S120 was rescaled from 0.79 to 0.32 ppm. The color-coding on the ERK2 plots are

defined as follows: ERK2 residues that were perturbed by KIM<sub>15-31</sub> are colored blue if the corresponding residues on p38 $\alpha$  were also perturbed, or magenta if the corresponding residues on p38 $\alpha$  were not perturbed. The latter residues are labeled on the ribbon representation. ERK2 residues are colored red if they were not perturbed by KIM<sub>15-31</sub> but the corresponding residues on p38 $\alpha$  were perturbed. Finally, ERK2 residues were colored gray if they were unassigned and the corresponding residues on p38 $\alpha$  were perturbed by KIM<sub>15-31</sub>. Similar color-coding and labeling schemes were used for the p38 $\alpha$  plots (right).

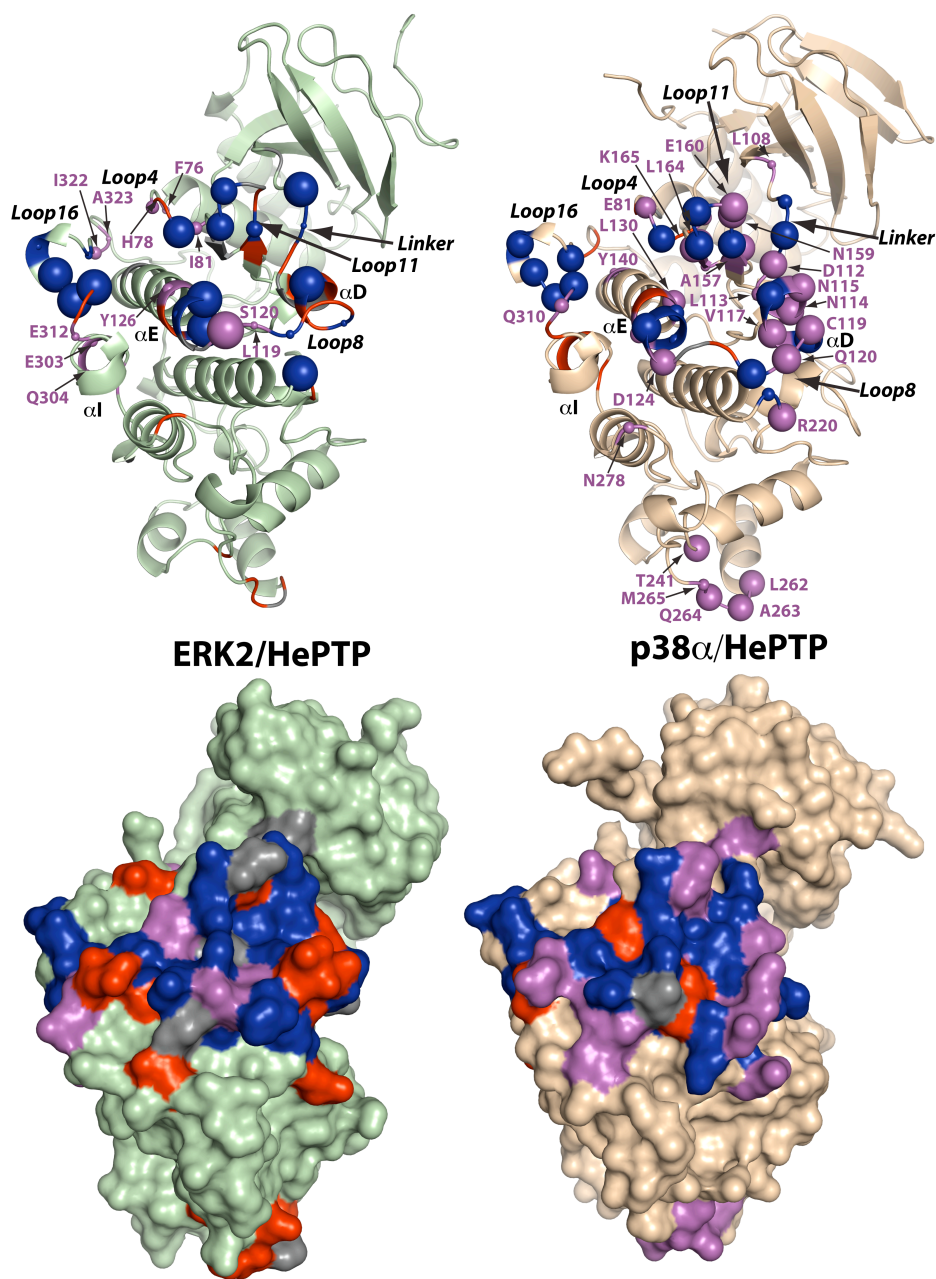

**Figure S3.** Comparison of the spectral perturbations induced by full-length HePTP on ERK2 (left) and p38 $\alpha$  (right) using ribbon (top) and surface (bottom) representations. The radii of the spheres on the top panel are proportional to the magnitude of the chemical shift perturbations. For visualization purposes (as in **Figure S2**), an arbitrary value of 0.25 ppm was assigned to the disappearing resonances. A color scheme identical to that described for **Figure S2** is used.

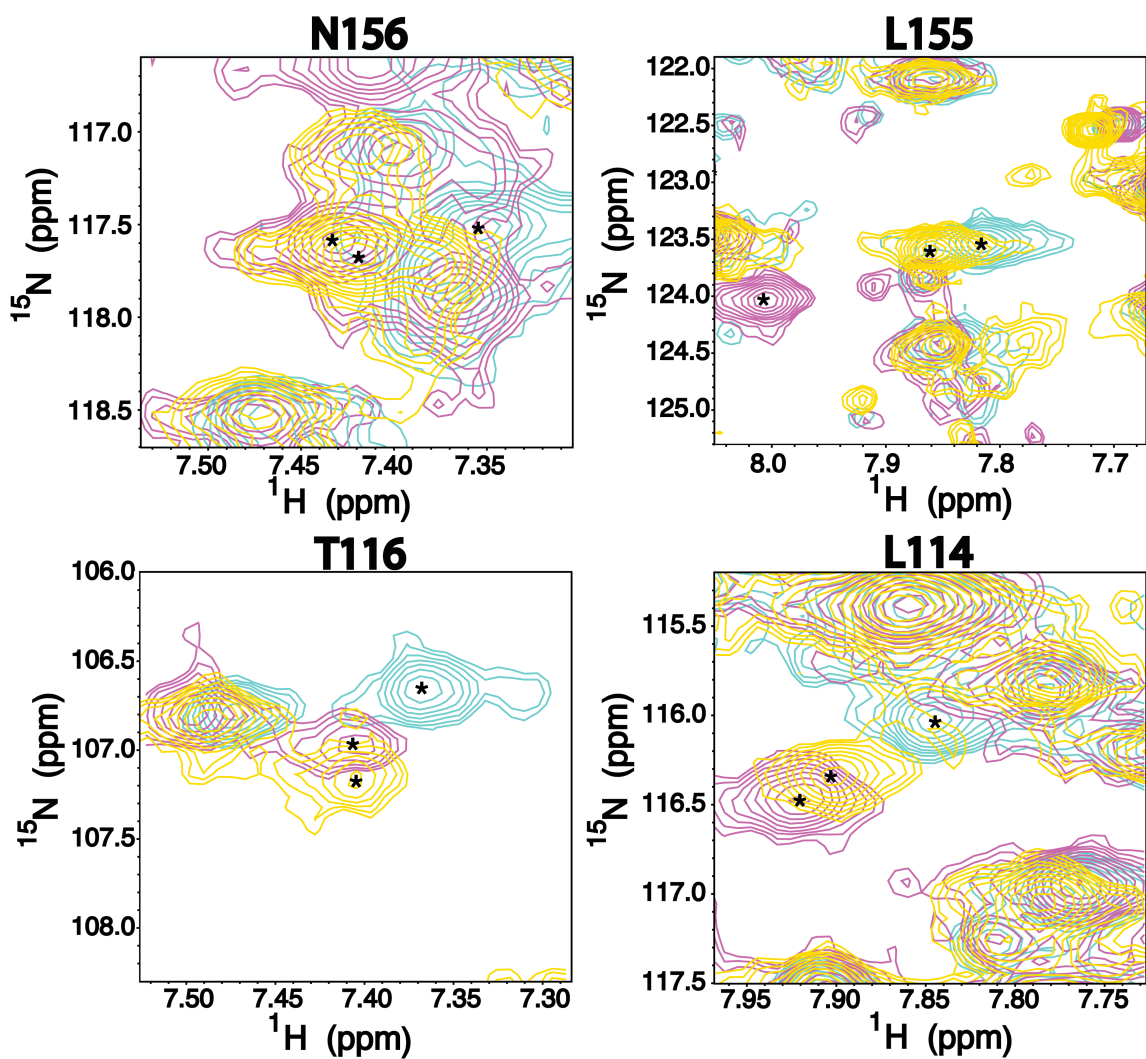

**Figure S4.** Comparison of  $^{15}\text{N},^1\text{H}$  TROSY resonances belonging to a subset of ERK2 residues for which the relative magnitude of the chemical shift changes is *lower* in the presence of full-length HePTP than in the presence of KIM<sub>15-31</sub>. In each inset, resonances (positions indicated by the \*) corresponding to free ERK2 (magenta), ERK2 bound to full-length HePTP (gold) and ERK2 bound to KIM<sub>15-31</sub> (moss) are shown.



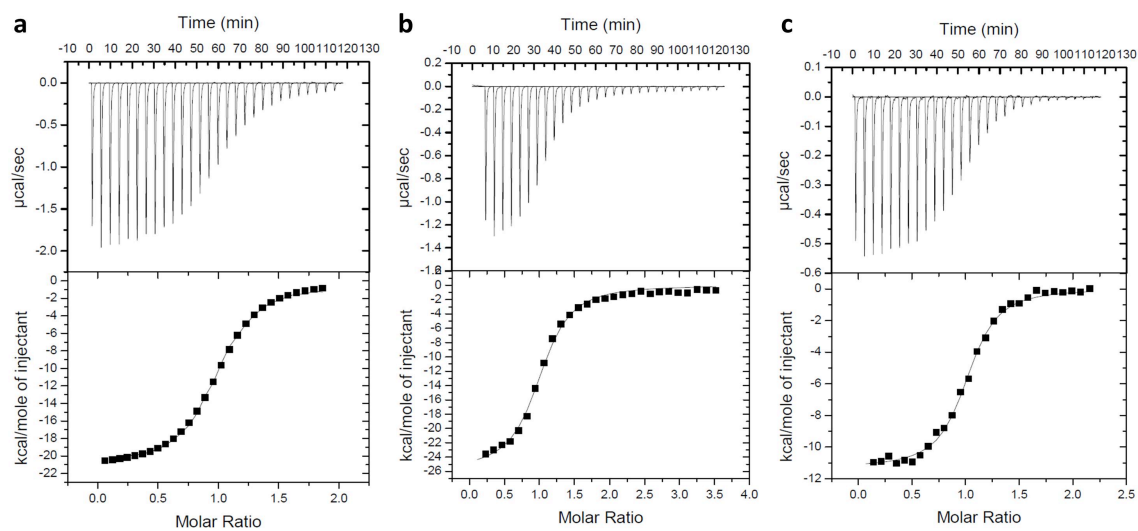

**Figure S5.** Raw ITC data (upper panels) and the corresponding derived binding isotherms plotted against the molar ratio of titrant fit using a one-site model (lower panels) for **(a)** ERK2 titrated with KIM<sub>15-31</sub>, **(b)** ERK2 titrated with KIMKIS, and **(c)** ERK2 titrated with full-length HePTP.



**Table S1.** Overview of the chemical shift perturbations (CSP) induced by KIM<sub>15-31</sub> on ERK2.

| Residue Number | Amino Acid | Perturbation (ppm) |
|----------------|------------|--------------------|
| 76             | F          | 0.077              |
| 78             | H          | 0.120              |
| 79             | E          | 0.035              |
| 80             | N          | 0.292              |
| 81             | I          | 0.112              |
| 82             | I          | 0.049              |
| 84             | I          | 0.044              |
| 105            | L          | Unassigned         |
| 107            | E          | 0.256              |
| 108            | T          | 0.059              |
| 109            | D          | 0.027              |
| 110            | L          | Unassigned         |
| 111            | Y          | Unassigned         |
| 113            | L          | 0.094              |
| 114            | L          | 0.090              |
| 115            | K          | 0.043              |
| 116            | T          | 0.051              |
| 117            | Q          | 0.069              |
| 118            | H          | 0.086              |
| 119            | L          | 0.052              |
| 120            | S          | 0.789              |
| 121            | N          | Unassigned         |
| 122            | D          | 0.295              |
| 123            | H          | 0.276              |
| 124            | I          | 0.198              |
| 125            | C          | 0.030              |
| 126            | Y          | 0.097              |
| 127            | F          | Unassigned         |
| 143            | V          | 0.052              |
| 151            | S          | 0.019              |
| 155            | L          | 0.205              |
| 155            | L          | 0.205              |
| 156            | N          | 0.080              |
| 157            | T          | Unassigned         |
| 158            | T          | 0.275              |
| 159            | C          | 0.248              |
| 160            | D          | 0.169              |
| 161            | L          | Unassigned         |
| 164            | C          | 0.053              |
| 222            | N          | 0.035              |
| 244            | S          | 0.017              |
| 265            | L          | 0.002              |
| 266            | P          | Unassigned         |
| 267            | H          | 0.013              |
| 268            | K          | 0.012              |
| 302            | V          | 0.058              |
| 303            | E          | 0.096              |
| 304            | Q          | 0.072              |

|     |   |          |
|-----|---|----------|
| 312 | E | 0.087    |
| 313 | Q | 0.019    |
| 314 | Y | 0.046    |
| 315 | Y | Vanished |
| 316 | D | 0.157    |
| 318 | S | 0.066    |
| 320 | E | 0.065    |
| 322 | I | 0.126    |
| 323 | A | 0.060    |
| 325 | A | 0.052    |

The color-coding scheme as described for **Figures S1** and **S2** has been used. Thus, values above the threshold are shaded blue (when the corresponding residue also perturbed in p38 $\alpha$ ) and magenta (residue perturbed only in ERK2). Residues for which the perturbations lie below the threshold in ERK2 but the corresponding positions are perturbed in p38 $\alpha$ , are shaded red. Gray shading represents residues unassigned in ERK2 but the corresponding position is perturbed in p38 $\alpha$ .

**Table S2:** Overview of the CSP induced by full-length HePTP on ERK2.

| Residue Number | Amino Acid | Perturbation (ppm) |
|----------------|------------|--------------------|
| 76             | F          | 0.076              |
| 78             | H          | 0.126              |
| 79             | E          | 0.041              |
| 80             | N          | 0.292              |
| 81             | I          | 0.124              |
| 82             | I          | Unassigned         |
| 105            | L          | Unassigned         |
| 107            | E          | Vanished           |
| 108            | T          | 0.057              |
| 109            | D          | 0.027              |
| 110            | L          | Unassigned         |
| 111            | Y          | Unassigned         |
| 112            | K          | 0.003              |
| 113            | L          | Vanished           |
| 114            | L          | 0.024              |
| 115            | K          | 0.060              |
| 116            | T          | 0.019              |
| 117            | Q          | 0.021              |
| 118            | H          | 0.075              |
| 119            | L          | 0.068              |
| 120            | S          | Vanished           |
| 121            | N          | Unassigned         |
| 122            | D          | 0.078              |
| 123            | H          | Vanished           |
| 124            | I          | Vanished           |
| 125            | C          | 0.033              |
| 126            | Y          | 0.114              |
| 127            | F          | Unassigned         |
| 137            | Y          | Unassigned         |
| 151            | S          | 0.010              |
| 154            | L          | 0.008              |
| 155            | L          | 0.151              |
| 156            | N          | 0.011              |
| 157            | T          | Unassigned         |
| 158            | T          | 0.233              |
| 159            | C          | 0.243              |
| 161            | L          | Unassigned         |
| 162            | K          | Unassigned         |
| 163            | I          | Unassigned         |
| 222            | N          | Vanished           |
| 223            | R          | 0.023              |
| 244            | S          | 0.006              |
| 265            | L          | 0.012              |
| 266            | P          | Unassigned         |
| 267            | H          | 0.017              |
| 268            | K          | 0.013              |
| 281            | D          | 0.028              |
| 301            | E          | 0.056              |
| 303            | E          | 0.094              |
| 304            | Q          | 0.074              |
| 312            | E          | 0.073              |
| 313            | Q          | 0.020              |

|     |   |          |
|-----|---|----------|
| 314 | Y | Vanished |
| 315 | Y | Vanished |
| 316 | D | Vanished |
| 318 | S | 0.069    |
| 320 | E | 0.071    |
| 322 | I | 0.122    |
| 323 | A | 0.055    |

The color-coding scheme is the same as in **Figures S1** and **S2**, and described at length for **Table S1** (above).

**Table S3.** Thermodynamic parameters and dissociation constants for the interactions of HePTP, KIMKIS and KIM<sub>15-31</sub> with ERK2 and p38 $\alpha$  derived from ITC measurements at 25 °C.

| Complex                    | K <sub>d</sub><br>(nM) |                 | $\Delta H$<br>(kcal·mol <sup>-1</sup> ) |                 | T $\Delta S$<br>(kcal·mol <sup>-1</sup> ) |                 | $\Delta G$<br>(kcal·mol <sup>-1</sup> ) |                |
|----------------------------|------------------------|-----------------|-----------------------------------------|-----------------|-------------------------------------------|-----------------|-----------------------------------------|----------------|
|                            | ERK2                   | p38 $\alpha$    | ERK2                                    | p38 $\alpha$    | ERK2                                      | p38 $\alpha$    | ERK2                                    | p38 $\alpha$   |
| <b>HePTP</b>               | 371 $\pm$ 40           | 2570 $\pm$ 650  | -11.5 $\pm$ 0.2                         | -20.5 $\pm$ 2.3 | -2.7 $\pm$ 0.3                            | -12.9 $\pm$ 2.2 | -8.8 $\pm$ 0.1                          | -7.6 $\pm$ 0.1 |
| <b>KIMKIS</b>              | 679 $\pm$ 122          | 778 $\pm$ 28    | -24.4 $\pm$ 1.7                         | -24.9 $\pm$ 1.0 | -15.9 $\pm$ 1.7                           | -16.6 $\pm$ 1.0 | -8.4 $\pm$ 0.1                          | -8.3 $\pm$ 0.0 |
| <b>KIM<sub>15-31</sub></b> | 1277 $\pm$ 110         | 5150 $\pm$ 1290 | -20.7 $\pm$ 2.5                         | -19.6 $\pm$ 5.5 | -12.7 $\pm$ 2.5                           | -12.4 $\pm$ 5.6 | -8.0 $\pm$ 0.1                          | -7.2 $\pm$ 0.1 |

Data represent mean  $\pm$  one standard deviation derived from measurements in triplicate.

Data for p38 $\alpha$  from Francis et. al.<sup>3</sup>

## References

- (1) Piserchio, A., Warthaka, M., Devkota, A. K., Kaoud, T. S., Lee, S., Abramczyk, O., Ren, P., Dalby, K. N., and Ghose, R. (2011) Solution NMR insights into docking interactions involving inactive ERK2, *Biochemistry* 50, 3660-3672.
- (2) Mustelin, T., Tautz, L., and Page, R. (2005) Structure of the hematopoietic tyrosine phosphatase (HePTP) catalytic domain: structure of a KIM phosphatase with phosphate bound at the active site, *J. Mol. Biol.* 354, 150-163.
- (3) Francis, D. M., Rozycki, B., Koveal, D., Hummer, G., Page, R., and Peti, W. (2011) Structural basis of p38 $\alpha$  regulation by hematopoietic tyrosine phosphatase, *Nature Chem. Biol.* 7, 916-924.
- (4) Salzmann, M., Pervushin, K., Wider, G., Senn, H., and Wuthrich, K. (1998) TROSY in triple-resonance experiments: new perspectives for sequential NMR assignment of large proteins, *Proc. Natl. Acad. Sci. USA* 95, 13585-13590.
- (5) Delaglio, F., Grzesiek, S., Vuister, G. W., Zhu, G., Pfeifer, J., and Bax, A. (1995) NMRPipe: a multidimensional spectral processing system based on UNIX pipes, *J. Biomol. NMR* 6, 277-293.
- (6) Schumann, F. H., Riepl, H., Maurer, T., Gronwald, W., Neidig, K. P., and Kalbitzer, H. R. (2007) Combined chemical shift changes and amino acid specific chemical shift mapping of protein-protein interactions, *J. Biomol. NMR* 39, 275-289.
- (7) Thompson, J. D., Higgins, D. G., and Gibson, T. J. (1994) CLUSTAL W: improving the sensitivity of progressive multiple sequence alignment through

sequence weighting, position-specific gap penalties and weight matrix choice,  
*Nucleic Acids Res.* 22, 4673-4680.
